# Supplementary material
Source: PubMed Central journal article supplement (PMC4905578)
Supplement: NIHMS791803-supplement-01.pdf [file NIHMS791803-supplement-01.pdf]

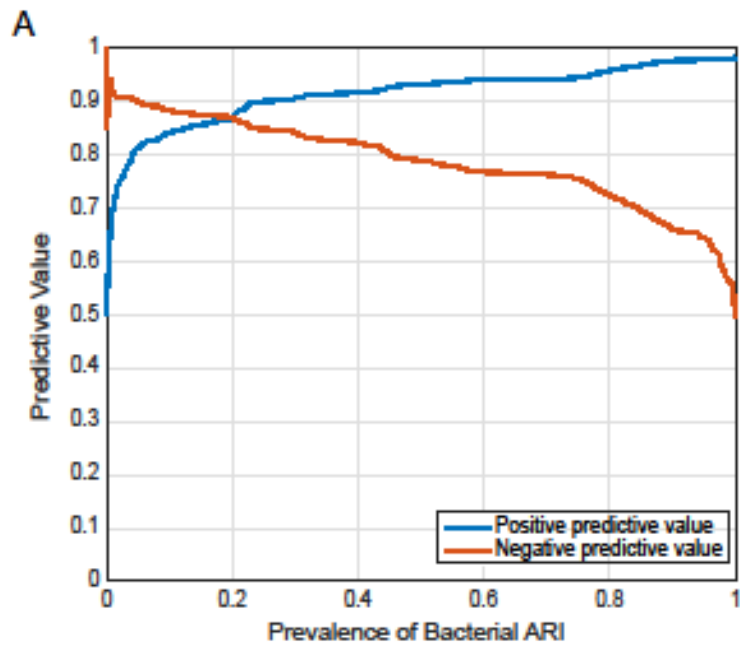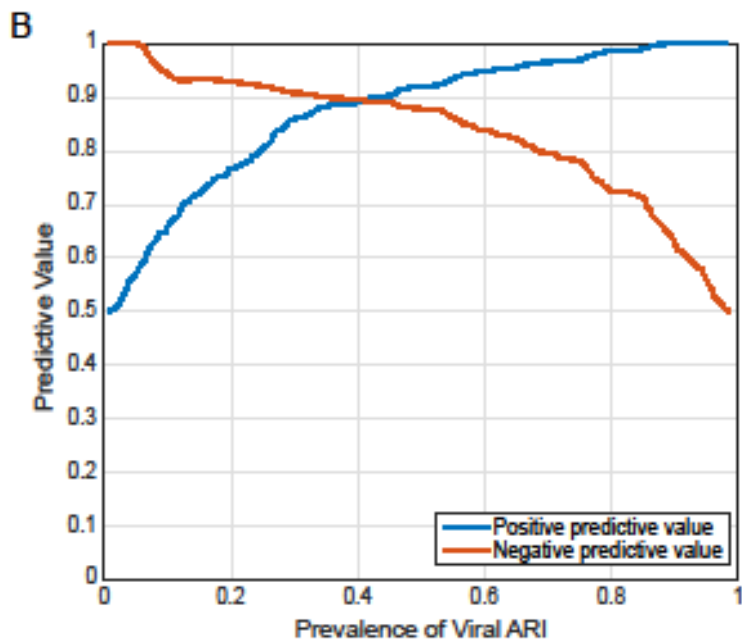

**Figure S1: Positive and negative predictive values for A) Bacterial and B) Viral ARI classification as a function of prevalence.**

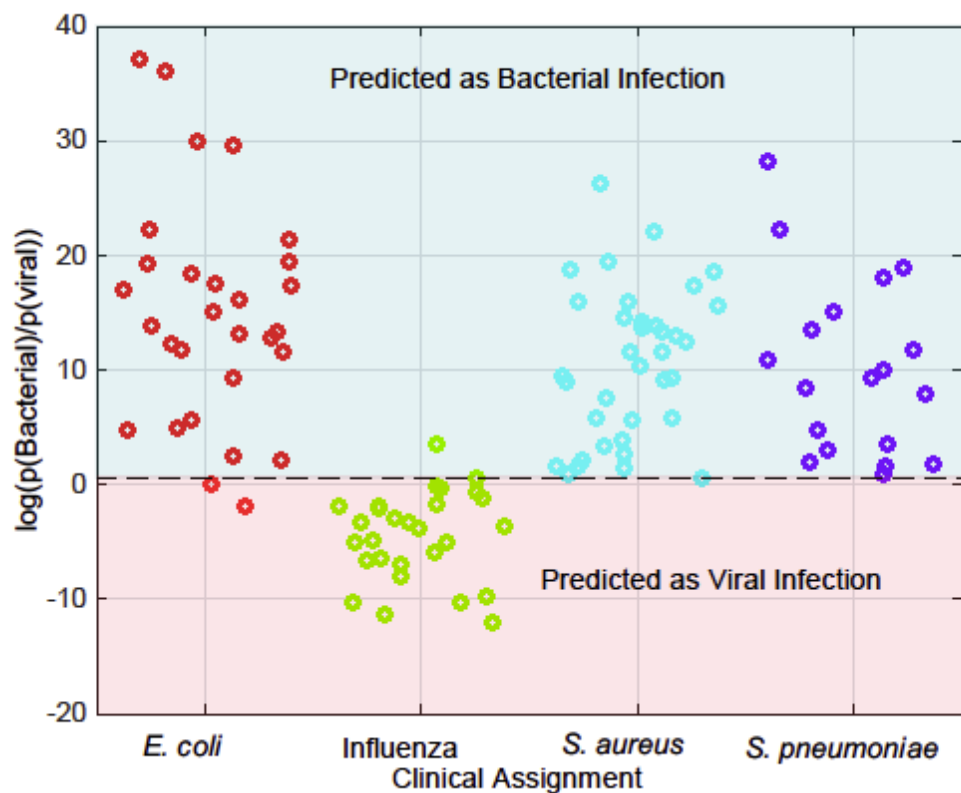

**Figure S2: Validation of Bacterial and Viral ARI Classifiers in GSE6269.** This dataset includes pediatric patients with acute infections caused by Influenza A virus (green circles), *Escherichia coli* (red circles), *Staphylococcus aureus* (light blue circles), or *Streptococcus pneumoniae* (purple circles). The vertical axis represents the log probability of classifier-assigned bacterial infection relative to classifier-assigned viral infection. Subjects falling in the top, blue section were classified as bacterial infection whereas those in the bottom, pink section were classified as viral infection.

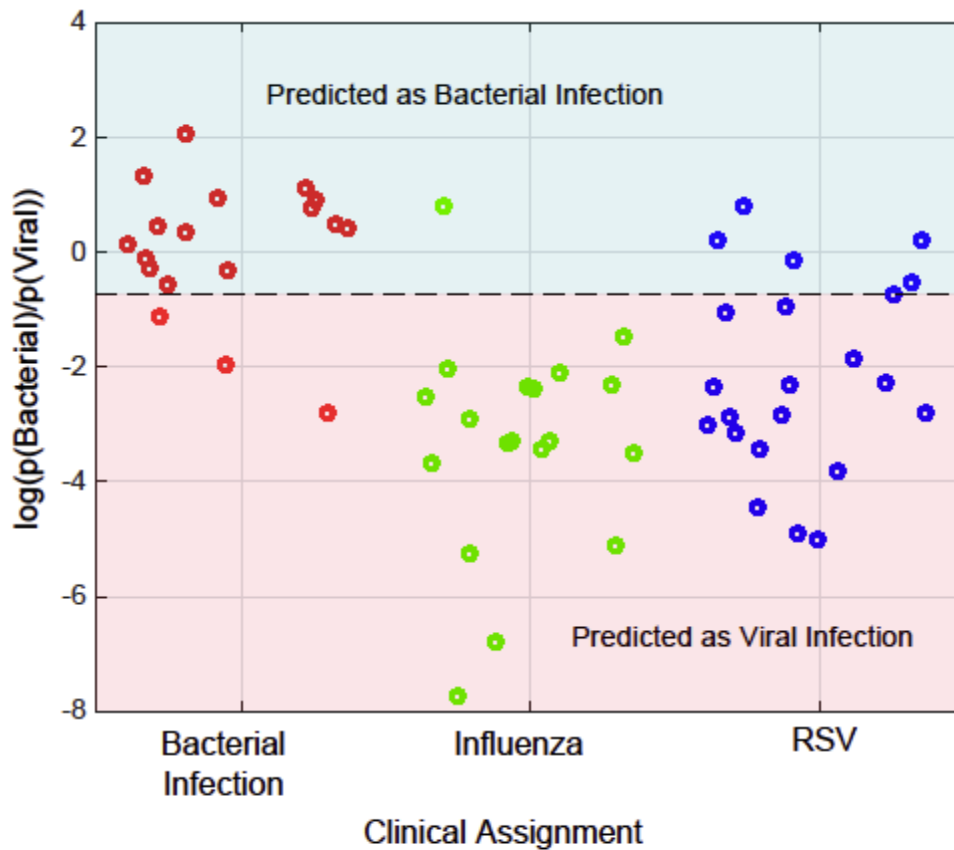

**Figure S3: Validation of Bacterial and Viral ARI Classifiers in GSE42026.** This dataset includes pediatric patients hospitalized with bacterial infection (red circles), Influenza H1N1/09 infection (green circles), or RSV infection (blue circles). The vertical axis represents the log probability of classifier-assigned bacterial infection relative to classifier-assigned viral infection. Subjects falling in the top, blue section were classified as bacterial infection whereas those in the bottom, pink section were classified as viral infection.

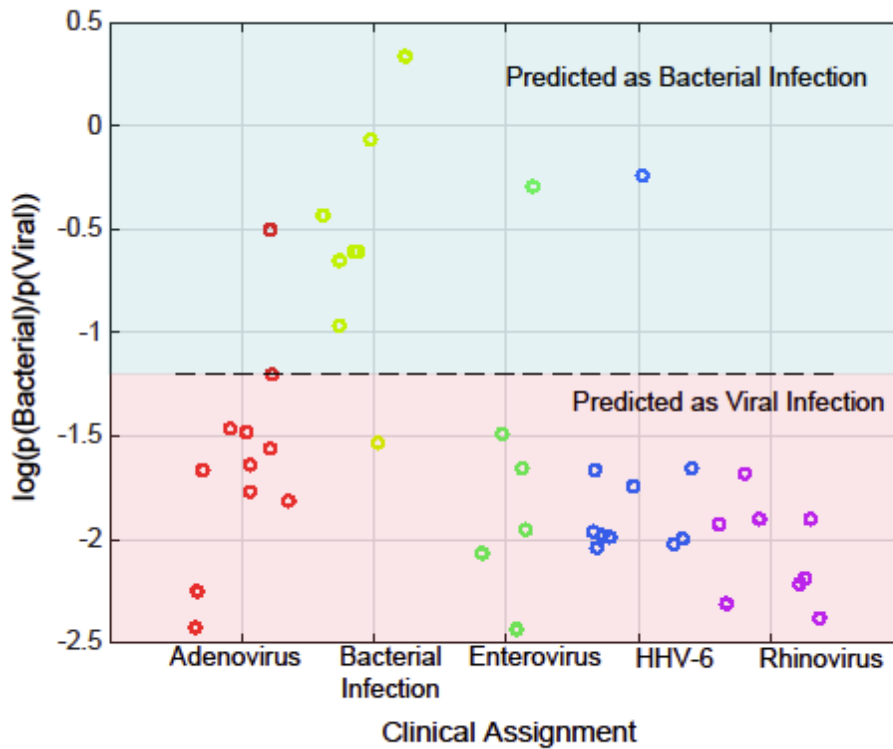

**Figure S4: Validation of Bacterial and Viral ARI Classifiers in GSE40396.** This dataset includes pediatric patients with infections due to adenovirus (red circles), bacteria (yellow circles), enterovirus (green circles), HHV-6 (blue circles), or rhinovirus (purple circles). The vertical axis represents the log probability of classifier-assigned bacterial infection relative to classifier-assigned viral infection. Subjects falling in the top, blue section were classified as bacterial infection whereas those in the bottom, pink section were classified as viral infection.

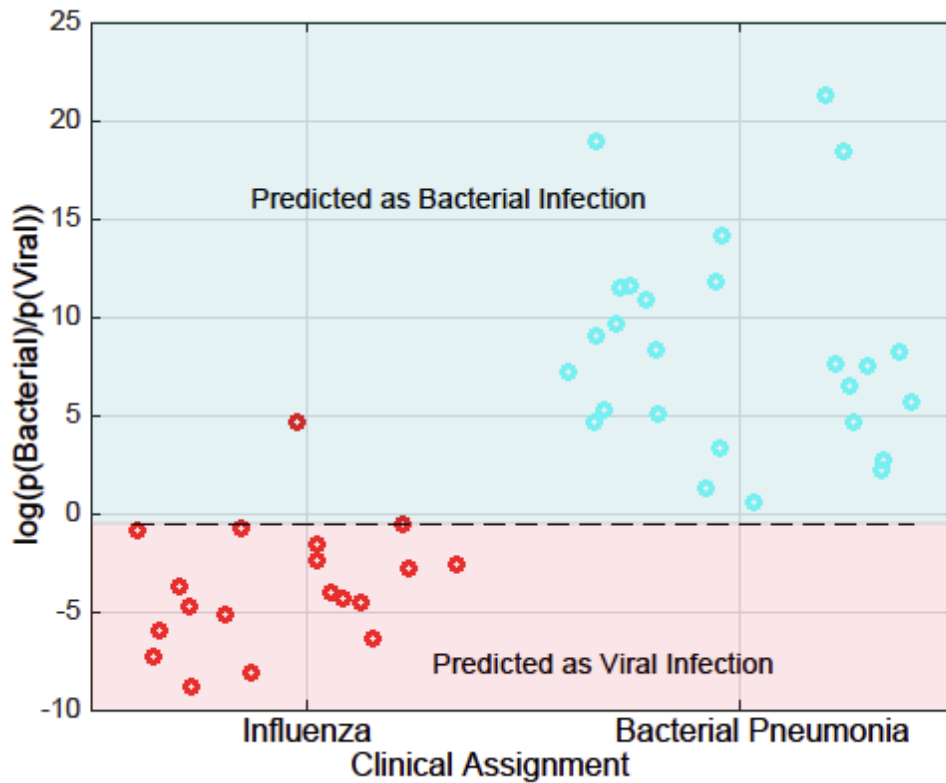

**Figure S5: Validation of Bacterial and Viral ARI Classifiers in GSE20346.** This dataset includes adult patients with influenza (red circles) or bacterial pneumonia (blue circles). The data represent subjects with serial samples whereby each sample was treated independently. The vertical axis represents the log probability of classifier-assigned bacterial infection relative to classifier-assigned viral infection. Subjects falling in the top, blue section were classified as bacterial infection whereas those in the bottom, pink section were classified as viral infection.

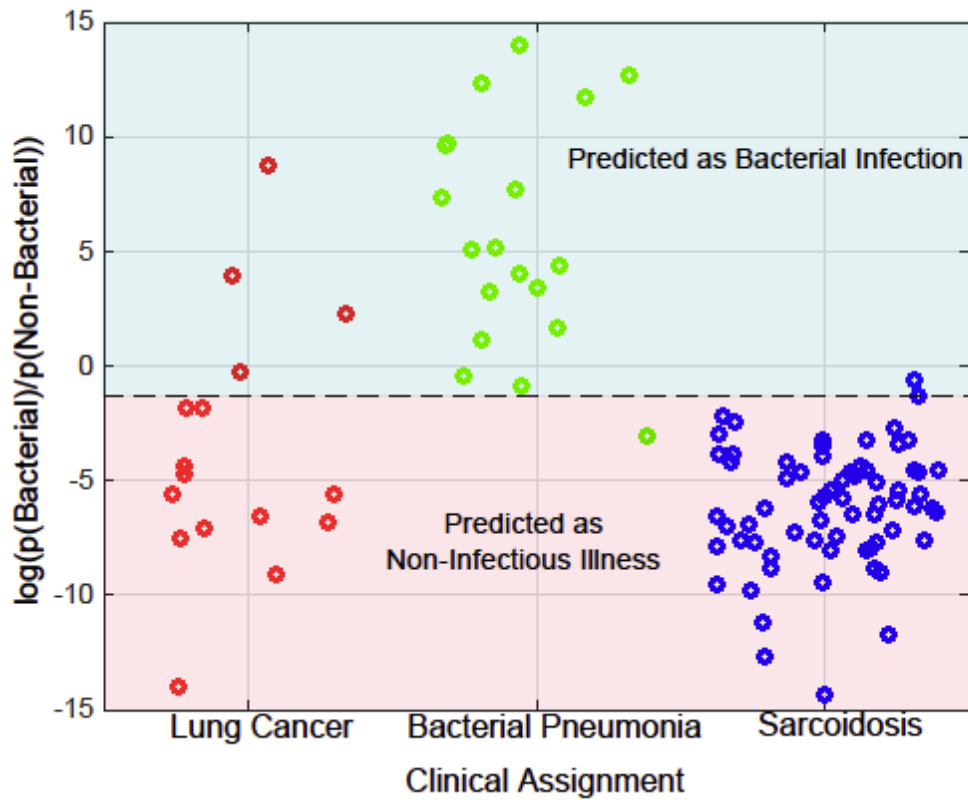

**Figure S6: Validation of Bacterial ARI and Non-Infectious Illness Classifiers in GSE42834.** This dataset includes adult patients with lung cancer (red circles), bacterial pneumonia (green circles), or sarcoidosis (blue circles). The vertical axis represents the log probability of classifier-assigned bacterial infection relative to classifier-assigned non-infectious illness. Subjects falling in the top, blue section were classified as bacterial infection whereas those in the bottom, pink section were classified as non-infectious illness.

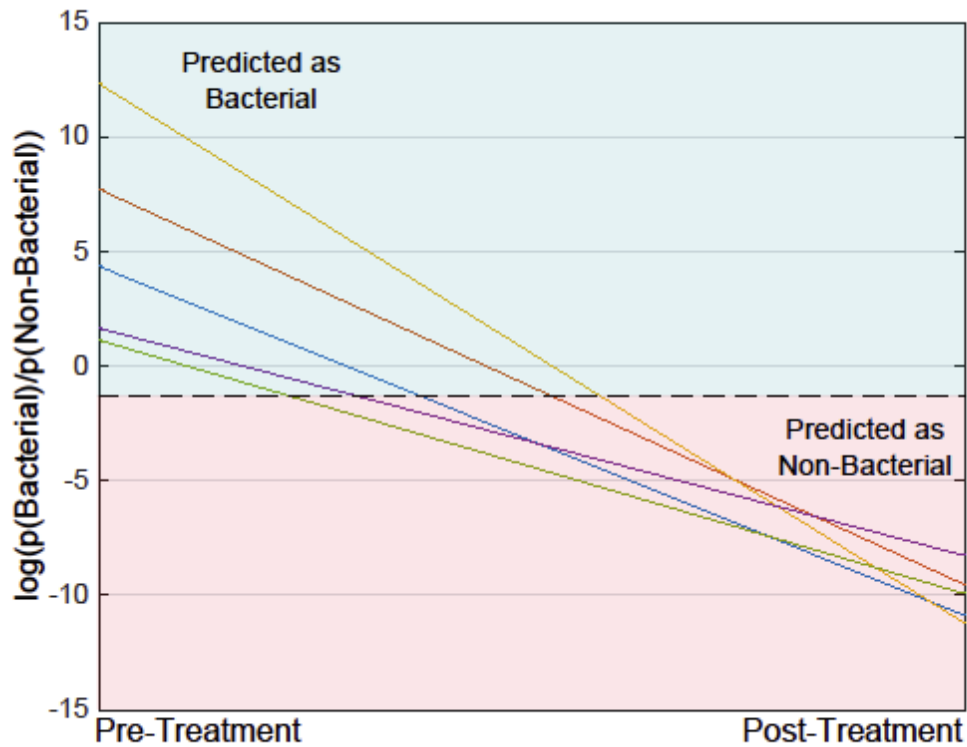

**Figure S7: Treatment effect on bacterial ARI classification.** Among the subjects included in GSE42834 (Figure S6) were five individuals with bacterial pneumonia, sampled prior to treatment as well as after treatment (at least 6 weeks after discharge). The vertical axis represents the log probability of classifier-assigned bacterial infection relative to classifier-assigned non-infectious illness. Subjects falling in the top, blue section were classified as bacterial infection whereas those in the bottom, pink section were classified as non-infectious illness. All five subjects were correctly classified as bacterial ARI prior to treatment, which resolved after treatment.

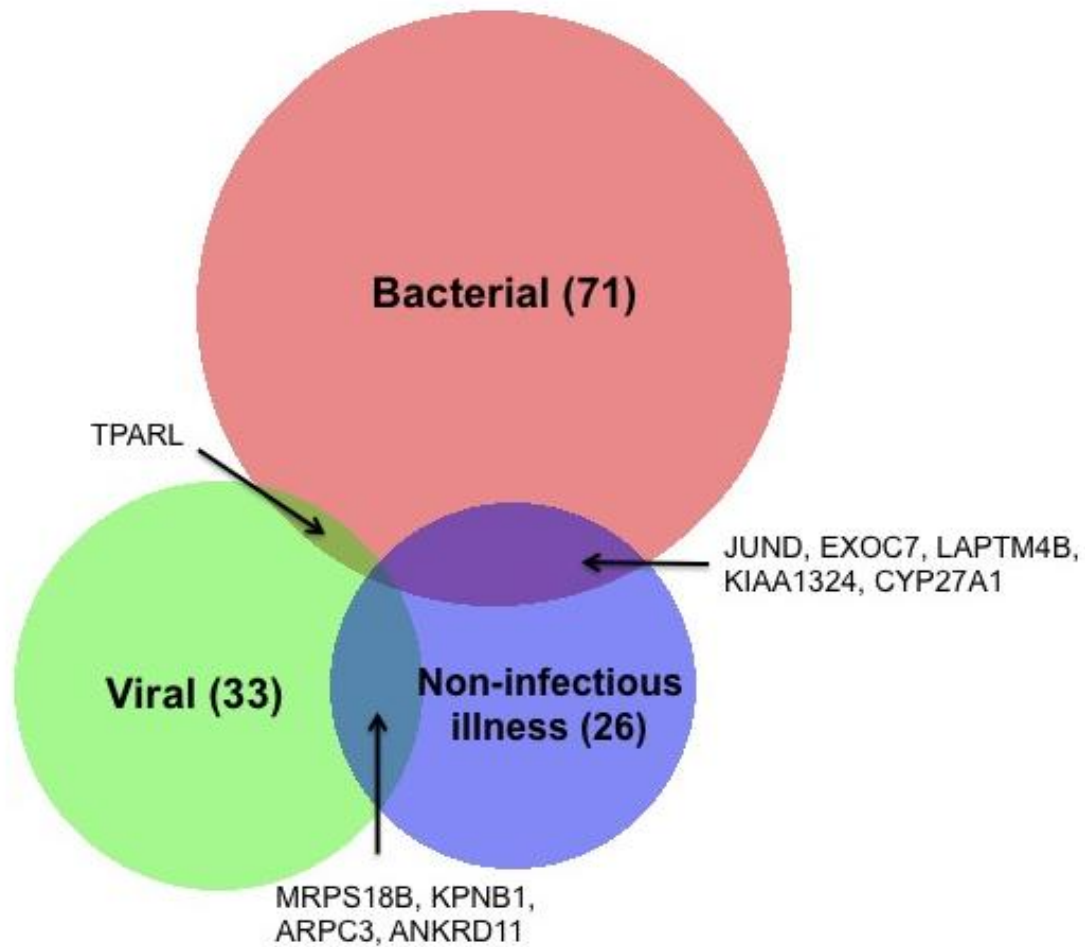

**Figure S8. Venn diagram representing overlap in the Bacterial ARI, Viral ARI, and Non-infectious Illness Classifiers.** There are 71 genes in the Bacterial ARI Classifier, 33 in the Viral ARI Classifier, and 26 in the Non-infectious Illness Classifier. One gene overlaps between the Bacterial and Viral ARI Classifiers. Five genes overlap between the Bacterial ARI and Non-infectious Illness Classifiers. Four genes overlap between the Viral ARI and Non-infectious Illness Classifiers.



**Table S1. Etiological causes of illness for subjects with viral ARI, bacterial ARI, and non-infectious illness.** For subjects with infection, the source of positive microbiology is presented.

|                                                         | <b>Number of subjects</b> | <b>Sources<sup>a</sup></b>                     |    |
|---------------------------------------------------------|---------------------------|------------------------------------------------|----|
| Total Cohort                                            | 273                       |                                                |    |
| All Viral ARI                                           | 115                       |                                                |    |
| Coronavirus                                             | 7                         | All identified from respiratory sample sources |    |
| Cytomegalovirus                                         | 1                         |                                                |    |
| Enterovirus <sup>b</sup>                                | 23                        |                                                |    |
| Human Metapneumovirus                                   | 9                         |                                                |    |
| Influenza, non-typed                                    | 7                         |                                                |    |
| Influenza A, non-subtyped                               | 6                         |                                                |    |
| Influenza A, 2009 H1N1                                  | 37                        |                                                |    |
| Parainfluenza                                           | 1                         |                                                |    |
| Rhinovirus                                              | 19                        |                                                |    |
| Respiratory Syncytial Virus                             | 6                         |                                                |    |
| Multiple viruses (Coronavirus, Rhinovirus, Enterovirus) | 1                         |                                                |    |
| All Bacterial ARI                                       | 70                        |                                                |    |
| <i>Bacillus</i> species <sup>c</sup>                    | 1                         |                                                | Bl |
| <i>Bordetella bronchiseptica</i>                        | 1                         | Bl                                             |    |
| <i>Enterobacter aerogenes</i>                           | 1                         | Bl, BAL, and Sp                                |    |
| <i>Escherichia coli</i>                                 | 1                         | Bl                                             |    |
| <i>Haemophilus influenzae</i>                           | 3                         | Sp(2), Pl(1)                                   |    |
| <i>Legionella</i> sp.                                   | 3                         | Ag(3)                                          |    |
| <i>Mycoplasma pneumoniae</i>                            | 1                         | Ser                                            |    |
| <i>Pasteurella multocida</i>                            | 1                         | Bl                                             |    |
| <i>Proteus mirabilis</i>                                | 1                         | Sp                                             |    |

|                                                                                                                                   |    |                                                  |
|-----------------------------------------------------------------------------------------------------------------------------------|----|--------------------------------------------------|
| <i>Pseudomonas aeruginosa</i>                                                                                                     | 4  | Sp(4)                                            |
| <i>Staphylococcus aureus</i>                                                                                                      | 7  | Bl(6), Sp(1)                                     |
| <i>Streptococcus pneumoniae</i>                                                                                                   | 30 | Ag(21), Bl(3),<br>Bl and Ag (4),<br>Pl(1), Sp(1) |
| <i>Streptococcus pyogenes</i>                                                                                                     | 4  | Ph(3),<br>Bl and Ph(1)                           |
| Viridans Group <i>Streptococcus</i>                                                                                               | 1  | Pl                                               |
| Polymicrobial <sup>c</sup>                                                                                                        | 11 |                                                  |
| <i>Pantoea</i> sp. / Coagulase negative <i>Staphylococcus</i>                                                                     | 1  | Bl/Bl                                            |
| <i>Pseudomonas aeruginosa</i> / <i>Alcaligenes xylosoxidans</i>                                                                   | 1  | Sp/Sp                                            |
| <i>Pseudomonas aeruginosa</i> / <i>Serratia marcescens</i>                                                                        | 1  | BAL/BAL                                          |
| <i>Staphylococcus aureus</i> / <i>Haemophilus influenzae</i>                                                                      | 2  | Sp/Sp(2)                                         |
| <i>Staphylococcus aureus</i> / <i>Proteus mirabilis</i> /<br><i>Haemophilus influenza</i>                                         | 1  | Sp/Bl/Sp                                         |
| <i>Staphylococcus aureus</i> / Viridans Group <i>Streptococcus</i><br>/ <i>Escherichia coli</i> / <i>Streptococcus pneumoniae</i> | 1  | BAL/BAL<br>/BAL/Ag                               |
| <i>Streptococcus pneumoniae</i> / <i>Haemophilus sp.</i>                                                                          | 1  | Sp and Ag/Sp                                     |
| <i>Streptococcus pneumoniae</i> / <i>Staphylococcus aureus</i>                                                                    | 3  | Ag (3)/Sp(2),<br>and Bl(1)                       |
| All Non-Infectious Illness                                                                                                        | 88 |                                                  |
| Acute Renal Failure; Hypovolemia                                                                                                  | 1  |                                                  |
| Alcohol intoxication; Spinal cord stenosis; Hyperglycemia                                                                         | 1  |                                                  |
| Arrhythmia                                                                                                                        | 2  |                                                  |
| Asthma                                                                                                                            | 1  |                                                  |
| Atypical Chest Pain                                                                                                               | 2  |                                                  |
| AV Graft Pseudoaneurysm and Thrombus                                                                                              | 1  |                                                  |

|                                                         |    |
|---------------------------------------------------------|----|
| Brain Metastases with Vasogenic Edema                   | 1  |
| Cerebrovascular Accident                                | 1  |
| Chronic Obstructive Pulmonary Disease                   | 6  |
| Cocaine Intoxication                                    | 1  |
| Congestive Heart Failure                                | 17 |
| Congestive Heart Failure; Amiodarone Toxicity           | 1  |
| Congestive Heart Failure; Arrhythmia                    | 1  |
| Congestive Heart Failure; Pulmonary Artery Hypertension | 1  |
| Constrictive Pericarditis                               | 1  |
| Cryptogenic Organizing Pneumonia                        | 1  |
| Gastrointestinal Hemorrhage                             | 3  |
| Hematoma in Leg                                         | 1  |
| Hemochromatosis                                         | 1  |
| Hemothorax                                              | 1  |
| Heroin Overdose                                         | 1  |
| Hyperglycemia                                           | 2  |
| Hypertensive Emergency                                  | 3  |
| Hypovolemia                                             | 1  |
| Infarcted Uterine Fibroid                               | 1  |
| Lung Cancer; Coronary Artery Disease                    | 1  |
| Lung Cancer; Hemoptysis                                 | 1  |
| Mitochondrial Disorder; Acidosis                        | 1  |
| Myocardial Infarction                                   | 2  |
| Myocardial Infarction; Hypovolemia                      | 1  |
| Nephrolithiasis                                         | 2  |
| Pancreatitis                                            | 4  |

|                                                   |   |
|---------------------------------------------------|---|
| Post-operative Vocal Cord Paralysis               | 1 |
| Hyperemesis Gravidarum; Allergic Rhinitis         | 1 |
| Pulmonary Embolism                                | 5 |
| Pulmonary Embolism; Myocardial Infarction         | 1 |
| Pulmonary Embolism; Pulmonary Artery Hypertension | 1 |
| Pulmonary Fibrosis                                | 2 |
| Pulmonary Mass                                    | 1 |
| Reactive Arthritis                                | 1 |
| Rhabdomyolysis                                    | 1 |
| Ruptured Aneurysm; Hypovolemic Shock              | 1 |
| Severe Aortic Stenosis                            | 1 |
| Small Bowel Obstruction                           | 1 |
| Stills Disease                                    | 1 |
| Systemic Lupus Erythematosus                      | 1 |
| Tracheobronchomalacia                             | 1 |
| Transient Ischemic Attack                         | 1 |
| Ulcerative Colitis                                | 1 |
| Urethral Obstruction                              | 1 |

<sup>a</sup> The number of times each pathogen was identified in the specified source is noted in parentheses. A given pathogen may be isolated from more than one source (e.g., blood and sputum), which are separated by a comma. For polymicrobial bacterial infections, the source of pathogen identification is listed for each organism, separated by a forward slash. Ag-Antigen Test, BI-Blood Culture, BAL-Bronchoalveolar Lavage Culture, PI-Pleural Fluid Culture, Ph-Pharyngeal Swab Culture, Ser-Serology, Sp-Sputum Culture

<sup>b</sup> Enterovirus indicates the identification of Echovirus or Coxsackievirus as in most cases the molecular assay did not differentiate.

<sup>c</sup> This patient was adjudicated as having a bacterial ARI with Bacillus species identified as the etiologic agent. We later recognized Bacillus species was not the correct microbiological etiology although the clinical history was otherwise consistent with bacterial pneumonia. As this error was identified after model derivation, we included the subject in all subsequent analyses.

**Table S2. Summary of clinical features for the derivation cohort.**

|                                             | <b>Bacterial ARI</b> | <b>Viral ARI</b>   | <b>Non-Infectious Illness</b> |
|---------------------------------------------|----------------------|--------------------|-------------------------------|
| Total Cohort Size                           | 70                   | 115                | 88                            |
| Comorbidities                               |                      |                    |                               |
| Diabetes                                    | 17/70 (24%)          | 17/74 (23%)        | 35/88 (40%)                   |
| Congestive Heart Failure                    | 4/63 (6%)            | 2/74 (3%)          | 15/75 (20%)                   |
| Chronic Kidney Disease                      | 8/69 (12%)           | 2/74 (3%)          | 20/88 (23%)                   |
| Chronic Liver Disease                       | 2/70 (3%)            | 0/74 (0%)          | 2/84 (2%)                     |
| Chronic Lung Disease                        | 24/69 (35%)          | 24/74 (32%)        | 31/88 (35%)                   |
| Immunosuppression                           | 3/69 (4%)            | 7/74 (9%)          | 13/84 (15%)                   |
| Corticosteroids <sup>a</sup>                | 3/3 (100%)           | 5/7 (71%)          | 11/13 (85%)                   |
| Chemotherapy                                | 1/3 (33%)            | 1/7 (14%)          | 2/13 (15%)                    |
| Other                                       | 0/3 (0%)             | 3/7 (43%)          | 0/13 (0%)                     |
| Neoplastic Disease                          | 6/70 (9%)            | 2/74 (3%)          | 9/86 (10%)                    |
| Smoker, Current                             | 26/67 (39%)          | 16/108 (15%)       | 28/81 (35%)                   |
| WBC count x10 <sup>9</sup> /L,<br>mean ± SD | 14.0 ± 7.2 (N=68)    | 9.3 ± 4.6 (N=41)   | 12.5 ± 6.1 (N=73)             |
| Neutrophil %, mean ± SD                     | 84.2 ± 10.8 (N=65)   | 73.6 ± 14.9 (N=41) | 75.9 ± 12.7 (N=70)            |
| Abnormal chest imaging                      | 62/69 (90%)          | 22/54 (41%)        | 40/63 (63%)                   |
| Temperature <36 or >38°C                    | 36/70 (51%)          | 33/69 (48%)        | 37/87 (43%)                   |

All values are presented as n/cohort size for whom data was available (%), unless otherwise specified.

<sup>a</sup> Corticosteroid ≥ 60mg/day of prednisone or equivalent for ≥ three days, or ≥ 10mg/day for > 30 days. A subject could be taking more than one type of immunosuppressant, hence the sums may exceed 100%.

**Table S3. Probes selected for the Bacterial ARI, Viral ARI, and Non-infectious Illness Classifiers.** Probe names are presented as Affymetrix probe IDs. Values for each probe represent the weight of each probe in the specified classifier.

| <b>Affymetrix Probe ID</b> | <b>Bacterial ARI Classifier</b> | <b>Viral ARI Classifier</b> | <b>Non-Infectious Illness Classifier</b> |
|----------------------------|---------------------------------|-----------------------------|------------------------------------------|
| 200042_at                  | 0                               | 0.0389975                   | 0                                        |
| 200947_s_at                | 1.78944                         | 0                           | 0                                        |
| 201055_s_at                | 0                               | 0                           | 1.25363                                  |
| 201188_s_at                | 0.606326                        | 0                           | 0                                        |
| 201341_at                  | 0.109677                        | 0                           | 0                                        |
| 202005_at                  | -0.680527                       | 0                           | 0                                        |
| 202145_at                  | 0                               | 0.166043                    | 0                                        |
| 202284_s_at                | -0.356457                       | 0                           | 0                                        |
| 202411_at                  | -0.0522361                      | 0                           | 0                                        |
| 202509_s_at                | 0                               | 0                           | 0.416714                                 |
| 202644_s_at                | 0.340624                        | 0                           | 0                                        |
| 202688_at                  | 0                               | 0.0050837                   | 0                                        |
| 202709_at                  | 0.427849                        | 0                           | 0                                        |
| 202720_at                  | 0                               | 0.0787402                   | 0                                        |
| 202864_s_at                | 0                               | 0.0293697                   | 0                                        |
| 202973_x_at                | -0.112081                       | 0                           | 0                                        |
| 203045_at                  | -0.850903                       | 0                           | 0                                        |
| 203153_at                  | -0.133743                       | 0                           | 0                                        |
| 203275_at                  | 0                               | 0.0745763                   | 0                                        |
| 203313_s_at                | -1.09463                        | 0                           | 0                                        |
| 203392_s_at                | 0                               | -0.0139199                  | 0                                        |
| 203455_s_at                | 0                               | 0                           | -0.0805395                               |

|             |             |            |           |
|-------------|-------------|------------|-----------|
| 203882_at   | 0           | 0.0345339  | 0         |
| 203979_at   | -0.00999102 | 0          | 0.301178  |
| 204392_at   | 0           | 0.111394   | 0         |
| 204490_s_at | 0.00732794  | 0          | 0         |
| 204545_at   | 0.342478    | 0          | 0         |
| 204750_s_at | 0.537475    | 0          | 0         |
| 205001_s_at | 0           | -0.067117  | 0         |
| 205008_s_at | 0           | 0.223868   | 0         |
| 205033_s_at | 0           | -0.0878603 | 0         |
| 205048_s_at | -0.0114514  | 0          | 0         |
| 205098_at   | -0.116414   | 0          | 0         |
| 205153_s_at | 0.132886    | 0          | 0         |
| 205164_at   | 0.46638     | 0          | 0         |
| 205200_at   | 0.87833     | 0          | 0         |
| 205312_at   | 0           | 0          | -0.394304 |
| 206207_at   | -0.0852924  | 0          | 0         |
| 206371_at   | 0.0439022   | 0          | 0         |
| 206647_at   | 0.0650386   | 0          | 0         |
| 206676_at   | 0           | 0          | 0.0774651 |
| 206896_s_at | 0.482822    | 0          | 0         |
| 206918_s_at | 1.00926     | 0          | 0         |
| 206934_at   | 0.151959    | 0          | 0         |
| 207075_at   | -0.0627344  | 0          | 0         |
| 207194_s_at | 0.3162      | 0          | 0         |
| 207244_x_at | 1.30636     | 0          | 0         |
| 207436_x_at | 0           | 0.243737   | 0         |

|             |           |            |            |
|-------------|-----------|------------|------------|
| 207606_s_at | 0.299775  | 0          | 0          |
| 207718_x_at | 0.0392962 | 0          | 0          |
| 207840_at   | 0         | 0.118889   | 0          |
| 207860_at   | 0.376517  | 0          | 0          |
| 208029_s_at | -0.020511 | 0          | 0.394049   |
| 208545_x_at | 0.265408  | 0          | 0          |
| 208601_s_at | -0.270581 | 0          | 0          |
| 208702_x_at | 0         | 0          | 0.0426262  |
| 208736_at   | 0         | 0.582264   | -0.0862941 |
| 208886_at   | 0.149103  | 0          | 0          |
| 208974_x_at | 0         | 0.742946   | 0          |
| 209031_at   | 0         | 0          | 0.237916   |
| 209360_s_at | 0.303561  | 0          | 0          |
| 209396_s_at | 0         | 0          | 0.0355749  |
| 209511_at   | 0         | -0.031194  | 0          |
| 209605_at   | -0.499338 | 0          | 0          |
| 209919_x_at | 0.613197  | 0          | 0          |
| 210365_at   | 0.576935  | 0          | 0          |
| 210724_at   | 0         | 0          | 0.482166   |
| 210797_s_at | 0         | 0.185097   | 0          |
| 212035_s_at | 2.0241    | 0          | -1.26034   |
| 212162_at   | 0         | -0.0102331 | 0          |
| 212657_s_at | 0         | 0          | -0.254507  |
| 212697_at   | 0         | 0          | -1.02451   |
| 212708_at   | 0.0325637 | 0          | 0          |
| 212914_at   | 0         | 0          | 0.0099678  |



|             |            |              |           |
|-------------|------------|--------------|-----------|
| 212947_at   | 0.286979   | 0            | 0         |
| 213223_at   | 0.686657   | 0            | 0         |
| 213300_at   | -0.578303  | 0            | 0         |
| 213573_at   | 0          | 0            | -0.497655 |
| 213633_at   | -1.01336   | 0            | 0         |
| 214085_x_at | -0.367611  | 0            | 0         |
| 214097_at   | 0.00914993 | -0.576801    | 0         |
| 214175_x_at | 0          | 0            | -0.266628 |
| 214326_x_at | -0.698109  | 0            | 0.261075  |
| 214582_at   | 0          | 0            | 0.0377349 |
| 214617_at   | -0.261957  | 0            | 0         |
| 214800_x_at | 0          | 0.103261     | 0         |
| 214955_at   | -0.100645  | 0            | 0         |
| 215184_at   | 0          | -0.0650331   | 0         |
| 215268_at   | 0.0381782  | 0            | 0         |
| 215606_s_at | 0.479765   | 0            | 0         |
| 215804_at   | 1.94364    | 0            | 0         |
| 215848_at   | 0          | 0.326241     | 0         |
| 216289_at   | 0          | -0.000746072 | 0         |
| 216303_s_at | 0.31126    | 0            | 0         |
| 216473_x_at | 0          | -0.0342987   | 0         |
| 216571_at   | 0.878426   | 0            | 0         |
| 216713_at   | 0.510039   | 0            | 0         |
| 216867_s_at | -0.0534745 | 0            | 0         |
| 216943_at   | -0.916433  | 0            | 0         |
| 217143_s_at | -0.389097  | 0            | 0         |

|             |            |            |            |
|-------------|------------|------------|------------|
| 217408_at   | 0          | 1.07798    | -0.0690681 |
| 217593_at   | -0.0747507 | 0          | 0          |
| 217717_s_at | 0.638943   | 0          | 0          |
| 218095_s_at | 0          | -0.613773  | 0          |
| 218306_s_at | 0          | 0          | 0.784894   |
| 218595_s_at | 0          | 0          | -0.411708  |
| 218812_s_at | -0.967987  | 0          | 0          |
| 219055_at   | -0.0852367 | 0          | 0          |
| 219066_at   | 0          | 0.221446   | 0          |
| 219130_at   | 0          | -0.150771  | 0          |
| 219382_at   | 0.866643   | 0          | 0          |
| 219437_s_at | 0          | -0.405445  | 0.198273   |
| 219523_s_at | 0          | 0          | -0.0236667 |
| 219777_at   | 0          | 0.25509    | 0          |
| 220059_at   | -0.86817   | 0          | 0          |
| 220122_at   | 0.399475   | 0          | 0          |
| 220308_at   | 0          | -0.0345586 | 0          |
| 221491_x_at | -0.651431  | 0          | 0          |
| 221874_at   | -0.40581   | 0          | 0.017015   |
| 222059_at   | 0          | -0.112261  | 0          |
| 44673_at    | -0.0307987 | 0          | 0          |

**Table S4. Subjects with discordant predictions compared to clinical assignments.** Discordant cases are individually presented including the predicted probabilities of bacterial ARI, Viral ARI, or non-infectious illness. Demographic information, procalcitonin value when available, and clinical details accompany each case.

| Adjudicated Phenotype | Predicted Prob. of Bacterial ARI | Predicted Prob. of Viral ARI | Predicted Prob. of Non-Infectious Illness | Adjudicated Clinical Disease/Pathogen | Age | Race    | Sex    | PCT    | Clinical details                                                                                                                                                                                       |
|-----------------------|----------------------------------|------------------------------|-------------------------------------------|---------------------------------------|-----|---------|--------|--------|--------------------------------------------------------------------------------------------------------------------------------------------------------------------------------------------------------|
| Bacterial             | 0.433679                         | 0.464459                     | 0.068001                                  | Bacillus species                      | 57  | Black   | Female | N/A    | Presented with 1 day of dyspnea, 1 day after discharge for ankle fusion. Multilobar pneumonia on radiography. No cough, fever, hypoxia. All clinical cultures negative. Also with chronic HCV and SLE. |
| Non-infectious fever  | 0.582005                         | 0.0149736                    | 0.349332                                  | Asthma                                | 51  | Unknown | Male   | 0.105  | Respiratory distress, fever, cough, vomiting, diarrhea. Radiography normal. History of asthma requiring intubations.                                                                                   |
| Non-infectious fever  | 0.194149                         | 0.576351                     | 0.533146                                  | Thrombus/AV Graft pseudoaneurysm      | 58  | Black   | Female | 0.9545 | Diarrhea, nausea, vomiting 3 days prior to enrollment. Also with pain at old fistula site, found to have pseudoaneurysm. Culture of excised tissue was negative. History of SLE.                       |
| Bacterial             | 0.344464                         | 0.533779                     | 0.0568271                                 | Legionella sp.                        | 71  | Black   | Female | 0.5380 | One week of fever, nausea, anorexia, malaise. No respiratory symptoms. Chest x-ray with infiltrate. Legionella urinary antigen positive.                                                               |

|                      |            |          |           |                          |    |       |      |        |                                                                                                                                                                                                                                                                                                                                                        |
|----------------------|------------|----------|-----------|--------------------------|----|-------|------|--------|--------------------------------------------------------------------------------------------------------------------------------------------------------------------------------------------------------------------------------------------------------------------------------------------------------------------------------------------------------|
| Viral                | 0.453922   | 0.163974 | 0.7749    | Coxsackievirus/Echovirus | 19 | White | Male | 0.0647 | 3 days of dental pain, neck pain, sore throat, mild cough. Leukocytosis. Cultures negative including monospot, urinary Streptococcus antigen, CSF.                                                                                                                                                                                                     |
| Viral                | 0.780981   | 0.49098  | 0.0443173 | Cytomegalovirus          | 71 | White | Male | 0.1019 | Orthotopic heart transplant with CMV+ donor but negative recipient. Two days fever, nausea, cough, malaise, new pulmonary infiltrate. CMV shell vial culture positive. Other cultures negative but treating team expressed concern that bacterial pneumonia led to CMV activation.                                                                     |
| Viral                | 0.00145462 | 0.28323  | 0.640647  | Human Metapneumovirus    | 50 | Black | Male | 0.063  | Three weeks of dry cough, fever, nasal congestion, chills, myalgias, sore throat, rhinorrhea, nausea. Worsening 3 days prior to enrollment. Not responding to antibacterials prescribed elsewhere. Routine laboratory and radiography testing were normal.                                                                                             |
| Non-infectious fever | 0.00128437 | 0.510543 | 0.365797  | Congestive Heart Failure | 50 | Black | Male | 3.75   | Then had 2 days of dyspnea, nasal congestion, malaise, wheeze following recent treatment for bacteremia and DVT. Presented with hypertension, tachycardia, and hypoxia. Radiography with edema and superimposed infiltrate consistent with pneumonia. Microbiological testing was negative. Treated for hypertensive emergency and possible pneumonia. |

|                      |            |            |          |                              |    |       |        |        |                                                                                                                                                                                                                                              |
|----------------------|------------|------------|----------|------------------------------|----|-------|--------|--------|----------------------------------------------------------------------------------------------------------------------------------------------------------------------------------------------------------------------------------------------|
| Bacterial            | 0.00727129 | 0.301131   | 0.171867 | <i>Mycoplasma pneumoniae</i> | 43 | White | Female | 0.0805 | Two months of cough, fever despite courses of amoxicillin and cefuroxime. Presented with new chest pain, nausea. Leukocytosis present. CT showed lobar pneumonia. Mycoplasma serologies sent 5 days later, notably positive for IgM and IgG. |
| Viral                | 0.314994   | 0.113423   | 0.228395 | Influenza                    | 52 | Black | Female | 0.1495 | Two weeks of productive cough with one day of chest pain and chills. Chest x-ray with lobar infiltrate. Patient with SLE and rheumatoid arthritis on methotrexate.                                                                           |
| Non-infectious fever | 0.997491   | 0.00598759 | 0.200125 | Congestive Heart Failure     | 87 | Black | Male   | 42.08  | Patient with CHF and multiple myeloma had weakness, cough for 1 week. Febrile on presentation with infiltrate on chest x-ray. Patient with evidence of CHF and myocardial infarction.                                                        |
| Non-infectious fever | 0.00234552 | 0.896471   | 0.115316 | Congestive Heart Failure     | 59 | Black | Male   | 0.033  | Patient with HIV and HCV viremia had 1 week of rhinorrhea, cough, headache, cough, chills. Also w/recent cocaine use and hypertension.                                                                                                       |
| Non-infectious fever | 0.960204   | 0.108072   | 0.188852 | COPD                         | 64 | Black | Female | 0.4678 | Patient with COPD had several days of headache, sneezing, myalgias, postnasal drip and cough followed by dyspnea, purulent sputum, and wheeze.                                                                                               |
| Viral                | 0.314038   | 0.0788716  | 0.226326 | Influenza                    | 61 | White | Male   | 0.1095 | Symptoms included dyspnea, productive cough, chills, hypoxia, and                                                                                                                                                                            |

|           |             |           |           |                                           |    |       |        |        |                                                                                                                                                                                                                               |
|-----------|-------------|-----------|-----------|-------------------------------------------|----|-------|--------|--------|-------------------------------------------------------------------------------------------------------------------------------------------------------------------------------------------------------------------------------|
|           |             |           |           |                                           |    |       |        |        | bilateral heterogeneous opacities on chest x-ray.                                                                                                                                                                             |
| Viral     | 0.00240081  | 0.177579  | 0.702856  | Influenza                                 | 49 | White | Female | 0.051  | Two weeks sinus congestion, rhinorrhea, sore throat, dry cough. Followed by 1 day of chest tightness, wheeze, fever, nausea prior to enrollment. Chest x-ray normal.                                                          |
| Bacterial | 0.00910652  | 0.0858135 | 0.598645  | <i>S. aureus</i> and <i>H. influenzae</i> | 62 | Black | Male   | 0.4349 | Two days of fever, rigors, productive cough, dyspnea. Leukocytosis and chest x-ray with scattered reticular opacities. Heavy growth of <i>S. aureus</i> and <i>H. influenzae</i> in sputum culture.                           |
| Bacterial | 0.000493681 | 0.663552  | 0.298311  | <i>Pseudomonas aeruginosa</i>             | 31 | White | Male   | 0.1652 | Cystic fibrosis, discharged 1 week prior for flare. One day prior to enrollment developed dyspnea, abdominal cramping, diarrhea. Sick contact had "stomach virus". Cultures revealed known colonizers. No viral testing done. |
| Bacterial | 0.12685     | 0.798854  | 0.0484662 | <i>Streptococcus pneumoniae</i>           | 38 | Black | Male   | 0.3085 | HIV + patient developed 4 days of productive cough, dyspnea, diaphoresis, chills.                                                                                                                                             |
| Bacterial | 0.227432    | 0.650525  | 0.0179104 | <i>Streptococcus pneumoniae</i>           | 50 | Black | Female | 0.0517 | Patient with CHF and cocaine use had 4 days of productive cough, fever, nausea.                                                                                                                                               |
| Bacterial | 0.014179    | 0.35817   | 0.223517  | <i>Streptococcus pneumoniae</i>           | 75 | White | Male   | 1.02   | Chest congestion, fever, nausea, chills developed on the day of enrollment. Normal chest x-ray. Sputum culture                                                                                                                |

|                      |           |           |           |                                 |    |       |        |         |                                                                                                                                                                                                                                                                           |
|----------------------|-----------|-----------|-----------|---------------------------------|----|-------|--------|---------|---------------------------------------------------------------------------------------------------------------------------------------------------------------------------------------------------------------------------------------------------------------------------|
|                      |           |           |           |                                 |    |       |        |         | with <i>S. pneumoniae</i> . No other cause of symptoms identified.                                                                                                                                                                                                        |
| Bacterial            | 0.0639225 | 0.270096  | 0.0969815 | <i>Streptococcus pneumoniae</i> | 46 | Black | Female | 0.4887  | Patient with asthma developed fever, dyspnea. Found to have leukocytosis and normal chest radiography.                                                                                                                                                                    |
| Bacterial            | 0.0410368 | 0.0109875 | 0.915803  | <i>Streptococcus pneumoniae</i> | 61 | White | Male   | 0.7384  | Patient with COPD and metastatic lung cancer. Was treated 3 weeks prior for post-obstructive pneumonia. Then had 3 days of dyspnea, productive cough, wheeze, pleuritic chest pain. Chest x-ray with worsening cancer-related opacities. <i>S. pneumoniae</i> bacteremia. |
| Non-infectious fever | 0.444024  | 0.11632   | 0.388948  | Pancreatitis                    | 49 | Black | Male   | 0.1334  | Patient with recurrent pancreatitis. Developed abdominal pain, nausea, presyncope on the day of enrollment. Lipase elevated and CT showed uncomplicated pancreatitis. Febrile but with negative microbiological workup.                                                   |
| Non-infectious fever | 0.84564   | 0.0381138 | 0.297308  | Pulmonary Embolism              | 43 | Black | Female | 0.0754  | One day of pleuritic chest pain, mild cold symptoms including clear phlegm. CT with bilateral pulmonary emboli.                                                                                                                                                           |
| Non-infectious fever | 0.737696  | 0.339834  | 0.0247815 | Pulmonary Embolism              | 33 | Black | Female | 86.2700 | Patient with SLE and end-stage renal disease developed 6 days of cough, chest pain, hemoptysis. CT showed small pulmonary embolism and infiltrate, possibly pneumonia or infarcted lung.                                                                                  |

|                      |             |           |          |                               |    |       |        |        |                                                                                                                                                                                                                                                                                                      |
|----------------------|-------------|-----------|----------|-------------------------------|----|-------|--------|--------|------------------------------------------------------------------------------------------------------------------------------------------------------------------------------------------------------------------------------------------------------------------------------------------------------|
| Non-infectious fever | 0.409134    | 0.504434  | 0.12448  | Pulmonary Embolism            | 39 | White | Female | 0.0759 | Had productive cough and dyspnea 6 days prior while hospitalized for elective procedure. Then 1 day prior to enrollment developed pleuritic chest pain. CT showed pulmonary embolism with infarct.                                                                                                   |
| Bacterial            | 0.000329349 | 0.647979  | 0.241464 | <i>Streptococcus pyogenes</i> | 18 | White | Female | 0.0504 | Two days subjective fever, chills, cough, sore throat. Culture of oropharynx revealed <i>S. pyogenes</i> .                                                                                                                                                                                           |
| Non-infectious fever | 0.761944    | 0.0620277 | 0.354231 | Severe Aortic Stenosis        | 76 | White | Female | 0.6965 | Patient had abdominal pain, nausea and presented with situational syncope. CT showed small bowel wall thickening consistent with enteritis though hospitalization focused on concurrently identified severe aortic stenosis.                                                                         |
| Non-infectious fever | 0.752293    | 0.112757  | 0.276949 | Stills Disease                | 23 | White | Female | 0.4844 | Two weeks of fever, myalgia, and nausea despite outpatient empiric treatment with Tamiflu followed by azithromycin. Returned on the day of enrollment with pleural effusion, infiltrate, rash. No definitive diagnosis made at that time. After multiple recurrences, Still's Disease was diagnosed. |
| Viral                | 0.0126355   | 0.0957349 | 0.852353 | Influenza A 2009 H1N1         | 60 | Black | Male   | 0.114  | Patient with congestive heart failure developed fever, headache, cough, nausea, myalgias with known exposure to others with influenza.                                                                                                                                                               |



|           |            |           |           |                               |    |       |        |        |                                                                                                                                                                                                           |
|-----------|------------|-----------|-----------|-------------------------------|----|-------|--------|--------|-----------------------------------------------------------------------------------------------------------------------------------------------------------------------------------------------------------|
| Bacterial | 0.0864339  | 0.204116  | 0.338616  | <i>Streptococcus pyogenes</i> | 29 | Black | Female | 0.1631 | Three days sore throat, anorexia, malaise, productive cough, slight fever. Sick contacts with similar symptoms.                                                                                           |
| Viral     | 0.0146315  | 0.171745  | 0.587374  | Respiratory Syncytial Virus A | 43 | Black | Female | 0.166  | Five days before enrollment, the patient had fever, rhinorrhea, and cough. One day prior to enrollment, the patient had dyspnea, nausea, wheeze, headache, earache. Patient with reactive airway disease. |
| Viral     | 0.862128   | 0.0530905 | 0.0680673 | Rhinovirus                    | 33 | Black | Female | 0.1443 | Asthma flare for 1 day associated with nausea, vomiting, diarrhea, abdominal pain.                                                                                                                        |
| Viral     | 0.00252091 | 0.0911986 | 0.762412  | Rhinovirus                    | 64 | Black | Female | 0.0741 | Four days of productive cough, dyspnea, nasal congestion, rhinorrhea, and wheezing. Chest x-ray normal.                                                                                                   |
| Viral     | 0.00714781 | 0.41287   | 0.488051  | Rhinovirus                    | 28 | White | Female | 0.0661 | Two days of cough, nasal congestion, chills, myalgias, wheeze, fever, rhinorrhea, nausea, vomiting, diarrhea. Chest x-ray with infiltrate vs. summation shadows.                                          |

**Table S5. Genes in the Bacterial ARI, Viral ARI, and Non-infectious Illness Classifiers, grouped by biologic process.**

| <b>Biologic process</b>                          | <b>Bacterial</b>                                                   | <b>Viral</b>                                                     | <b>Non-infectious Illness</b>               |
|--------------------------------------------------|--------------------------------------------------------------------|------------------------------------------------------------------|---------------------------------------------|
| <b>Cell cycle regulation</b>                     | JUND* (-), NINJ1, IFI27, CDKN1A, C7orf19, SERTAD3                  | ZNF291                                                           | JUND* (+)                                   |
| <b>Regulation of cell growth</b>                 | YWHAB, PDGFA                                                       |                                                                  | APLP2                                       |
| <b>Development/<br/>Differentiation</b>          | GLIPR1, RUNX1, ST14, TGIF , EPHA1                                  | CTBP1                                                            | SP1, CEACAM8, ODZ3                          |
| <b>RNA transcription,<br/>processing</b>         | FLJ10379, RPS21* (+), RPL28, TAF4, RPP25                           | DDX3Y, POLR2F, RPS21* (-), BTF3, MRPS18B* (+), HSPC117, FLJ10287 | HEATR1, MRPS18B* (-)                        |
| <b>Role in nuclear transport</b>                 |                                                                    | KPNB1                                                            | KPNB1                                       |
| <b>Role in cell and<br/>membrane trafficking</b> | RAB6IP2, SH3BP1, EXOC7* (+), LAPTM4B, CPNE1, GNG7, TPARL, KIAA1324 | TPARL                                                            | EXOC7* (-), HERC1, LAPTM4B, KIAA1324, APLP2 |
| <b>Cell structure/ adhesion</b>                  | TMPRSS6, TUBB1, ARHGAP12, ICAM4, DSC2, FMOD                        | TES, ARPC3* (+), KIDINS220                                       | PDLIM4, IGSF4, PDE3B, ARPC3* (-), CHI3L1    |
| <b>Role in cell stress<br/>response</b>          | KIAA1324, KRIT1, ENC1                                              |                                                                  | CBX7, APLP2, KIAA1324                       |
| <b>Role in autophagy</b>                         | LAPTM4B* (-), KIAA1324* (-)                                        |                                                                  | KIAA1324* (+), LAPTM4B* (+)                 |
| <b>Role in apoptosis</b>                         | KRIT1, GLIPR1, CIAS1                                               | DAPK2, TNFSF10                                                   |                                             |
| <b>General Inflammatory<br/>response</b>         | TNFA1P3, FMOD, ITPR3, CIAS1, GNG7, CLC, IFI27, CCR1                | TNFSF10                                                          | HNRPA0, EMR3, IL1RN, TNFAIP2, CHI3L1        |
| <b>Interferon response</b>                       | IFIT1                                                              | SP100, IRF2, OASL, ISGF3G                                        |                                             |
| <b>Cytotoxic response</b>                        | PRF1                                                               | DefA1/3                                                          |                                             |
| <b>Toxin response</b>                            | P450 gene cluster, CYP2A6, ENC1, GGT1, TST                         |                                                                  |                                             |
| <b>T-cell signaling</b>                          | TRA/D@, CD44                                                       | Ly6E, CAMK1, CD160                                               |                                             |

|                                           |                                          |       |              |
|-------------------------------------------|------------------------------------------|-------|--------------|
| <b>B-cell signaling</b>                   | BRDG1, HLA-DRB1/3/4,<br>CD40             |       |              |
| <b>NK-cell response</b>                   | NCR1                                     | CD160 |              |
| <b>Phospholipid and calcium signaling</b> | MTMR1, CPNE1, PSPH,<br>ITPR3, CLC, MCTP1 |       |              |
| <b>Fatty acid metabolism</b>              | PEX6, GLUD1                              |       |              |
| <b>Cholesterol metabolism</b>             | CYP27A1* (-)                             |       | CYP27A1* (+) |
| <b>Amino acid metabolism</b>              | GLUD1, PSPH, GCAT                        |       |              |

\* Genes listed in more than one classifier. For genes in multiple classifiers, increased expression is denoted by (+) and decreased expression is denoted by (-).
